# Supplementary material for: Impact of COVID-19 on Breastfeeding among SARS-CoV-2 Infected Pregnant Women: A Single Centre Survey Study
Source: MDPI journal article supplement (doi:10.3390/ijerph20010228), 2022-12-23
Supplement: s1 [file s1]

**Figure S1. Impact of COVID-19 on breastfeeding among SARS-CoV-2 infected pregnant women: a single centre survey study**

NAME \_\_\_\_\_ SURNAME \_\_\_\_\_ AGE \_\_\_\_\_

-What is your marital status?

---

-What is your educational level or occupation?

---

-How many pregnancies did you have?

---

-Did you breastfeed your child in previous pregnancies?

---

-How was your baby delivered?

|                             |                         |
|-----------------------------|-------------------------|
| <b>spontaneous delivery</b> | <b>cesarean section</b> |
|-----------------------------|-------------------------|

-Gestational age at delivery:

---

-Length of hospitalization:

---

-What was the reason of your hospitalization?

---

-Do you have any health diseases?

---

-Did you or your fetus have any complications during the pregnancy?

---

-Your pregnancy was follow-up mainly by:

|                     |                |                 |
|---------------------|----------------|-----------------|
| <b>obstetrician</b> | <b>midwife</b> | <b>hospital</b> |
|---------------------|----------------|-----------------|

-Do you feel abandoned, neglected or isolated by your gynecologist because of Sars-COV-2?

---

-Were you separated from your baby at birth because of Sars-COV-2?

|            |           |
|------------|-----------|
| <b>YES</b> | <b>NO</b> |
|------------|-----------|

-If you were separated from your baby, did it affect your ability to breastfeed when you were reunited?

|            |           |
|------------|-----------|
| <b>YES</b> | <b>NO</b> |
|------------|-----------|

-Could you have a skin to skin contact in the first hour after the birth?

|            |           |
|------------|-----------|
| <b>YES</b> | <b>NO</b> |
|------------|-----------|

-Could you breastfeed your baby?

**YES** **NO**

-Did you have difficulties in breastfeeding your baby?

**YES** **NO**

-If you had difficulties, have you been advised to use the breast pump?

**YES** **NO**

-Did you have difficulties in breastfeeding your baby because of the fear of passing Sars-COV-2 to your son?

**YES** **NO**

-Did they tell you how to reduce the risk of infecting your baby?

**YES** **NO**

-Have you been discourage from breastfeed your baby during the Sars-COV-2 infection?

**YES** **NO**

-Did you have difficulties in breastfeeding your baby because of the symptoms?

**YES** **NO**

-Did they suggest you to wash your breast?

**YES** **NO**

-How long did you breastfeed your child?

---

-How and what did you feed your baby in the hospital?

|                                |                                 |
|--------------------------------|---------------------------------|
| <b>breastfeeding</b>           | <b>formula</b>                  |
| <b>breastfeeding + formula</b> | <b>by using the breast pump</b> |

-How and what did you feed your baby at home?

|                                |                                 |
|--------------------------------|---------------------------------|
| <b>breastfeeding</b>           | <b>formula</b>                  |
| <b>breastfeeding + formula</b> | <b>by using the breast pump</b> |

-Did your baby test positive for Sars-COV-2?

|            |           |
|------------|-----------|
| <b>YES</b> | <b>NO</b> |
|------------|-----------|

-During the Sars-COV-2 infection you were:

|                    |                     |                                       |
|--------------------|---------------------|---------------------------------------|
| <b>symptomatic</b> | <b>asymptomatic</b> | <b>too sick to look after my baby</b> |
|--------------------|---------------------|---------------------------------------|

-Which symptom have you showed?

---

-If you decided not to breastfeed your baby, what was the reason?

---
